# Supplementary material
Source: PubMed Central journal article supplement (PMC6719319)
Supplement: NIHMS1526414-supplement-4.pdf [file NIHMS1526414-supplement-4.pdf]

**Table S1.** Template information and RMSDs of the homology-modeled monomers obtained from sequence using Robetta. Related to STAR Methods.

| PDB ID | Symmetry | Template Chain | Template symmetry | Identity (%) | Coverage (%) | Best Model RMSD (Å) |
|--------|----------|----------------|-------------------|--------------|--------------|---------------------|
| 1dv7   | C2       | 1dqw_A         | C2                | 25           | 78           | 2.09                |
| 1muy   | C2       | 2abk_A         | C1                | 31           | 56           | 2.78                |
| 2nlv   | C2       | 2nwv_A         | C2                | 37           | 100          | 1.3                 |
| 3urr   | C2       | 3lf6_B         | C2                | 29           | 71           | 0.43                |
| 4zo2   | C2       | 4o98_A         | C2                | 28           | 98           | 1.31                |
| 1sg4   | C3       | 1ef9_A         | C1                | 24           | 69           | 0.18                |
| 2vji   | C3       | 2uve_A         | C1                | 24           | 32           | 16.92               |
| 4co0   | C3       | 3ncq_A         | C3                | 46           | 100          | 0.1                 |
| 4d7y   | C3       | 4dou_A         | C1                | 35           | 96           | 0.74                |
| 5i6n   | C3       | 1oe1_A         | C3                | 70           | 99           | 0.34                |
| 1ojr   | C4       | 1dzu_P         | C4                | 18           | 60           | 4.42                |
| 1p5b   | C4       | 1kbj_A         | C4                | 32           | 93           | 0.14                |
| 2o6n   | C4       | 1dd5_A         | C1                | 64           | 57           | 0.16                |
| 3v9o   | C4       | 2cg9_C         | A2B2              | -            | -            | 0.88                |
| 4xti   | C4       | 1nf7_B         | C4                | 59           | 98           | 0.94                |
| 1xb9   | C5       | 1dyo_A         | C1                | -            | -            | 0.2                 |
| 4avs   | C5       | 3pvn_A         | C5                | 51           | 99           | 0.36                |
| 4mby   | C5       | 1sie_A         | I                 | 58           | 98           | 0.51                |
| 4u62   | C5       | 3iys_A         | I                 | 56           | 99           | 0.12                |
| 5a12   | C5       | 4m05_B         | C5                | 42           | 99           | 0.64                |
| 1nlf   | C6       | 1mo4_A         | C1                | 21           | 21           | 0.19                |
| 2pmu   | C6       | 2hqr_A         | C2                | 21           | 79           | 1.05                |
| 2xf7   | C6       | 2b88_A         | C1                | -            | -            | 1.54                |
| 4ox6   | C6       | 3pac_A         | C3                | 37           | 71           | 0.11                |
| 4w64   | C6       | 1y12_A         | C6                | 88           | 31           | 0.73                |
| 1h64   | C7       | 1ljo_A         | C6                | 36           | 86           | 0.09                |
| 4owk   | C7       | 1abr_B         | A1B1              | 29           | 70           | 0.85                |
| 3b8o   | C8       | 1jad_A         | C2                | -            | -            | 9.75                |
| 4f87   | C8       | 2o1w_A         | C1                | -            | -            | 3.19                |

|      |    |        |      |    |     |       |
|------|----|--------|------|----|-----|-------|
| 3p9a | C9 | 2pbx_A | C2   | 80 | 3   | 12.67 |
| 3zqo | C9 | 3kz3_A | C2   | 40 | 55  | 7.35  |
| 1nxq | D2 | 1gco_A | D2   | 34 | 98  | 1.97  |
| 1orr | D2 | 1gy8_C | C2   | 23 | 99  | 0.71  |
| 2bv4 | D2 | 2chh_A | D2   | 62 | 100 | 0.39  |
| 2vqr | D2 | 3ed4_D | C2   | 25 | 73  | 1.99  |
| 4oqc | D2 | 2yzc_A | D2   | 37 | 97  | 0.15  |
| 1gxu | D3 | 2acy_A | C1   | 40 | 47  | 6.05  |
| 2cwl | D3 | 1oq4_A | C2   | 22 | 47  | 3.52  |
| 2j5g | D3 | 1szo_A | C3   | 48 | 96  | 0.16  |
| 3qns | D3 | 2y4d_A | C2   | 22 | 64  | 0.2   |
| 3v4f | D3 | 1gua_A | A1B1 | 58 | 99  | 0.38  |
| 1umg | D4 | 1jkj_B | A2B2 | 34 | 12  | 21.6  |
| 2r8e | D4 | 2o2x_A | C1   | 31 | 15  | 0.35  |

Legend

- : BLAST did not identify sufficient homology

I : Icosahedral

AnBm: Heteromer stoichiometry

**Table S2.** Estimated reasons for failure of targets. Related to Figure 4 and Table 3.

| PDB ID | Symmetry | Reason for failure |
|--------|----------|--------------------|
| 1muy   | C2       | Input model        |
| 3urr   | C2       | Scoring (C & A)    |
| 2vji   | C3       | Input model        |
| 2pmu   | C6       | Scoring (C & A)    |
| 2xf7   | C6       | Scoring (C & A)    |
| 4owk   | C7       | Scoring (C & A)    |
| 3b8o   | C8       | Input model        |
| 4f87   | C8       | Input model        |
| 3p9a   | C9       | Input model        |
| 3zqo   | C9       | Input model        |
| 1orr   | D2       | Scoring (C & A)    |
| 2vqr   | D2       | Sampling           |
| 1gxu   | D3       | Input model        |
| 2cwl   | D3       | Input model        |
| 3qns   | D3       | Sampling           |
| 3v4f   | D3       | Sampling           |
| 1umg   | D4       | Input model        |

#### Legend

*Input model:* In an input model failure, the  $\text{RMSD}_{\text{C}\alpha}$  from native of the best input monomer is greater than 2.5 Å.

*Scoring (C):* In a coarse-grained scoring failure, re-docking the native structure fails to produce models with better (lower) motif dock scores than incorrect non-native docking models.

*Scoring (A):* In an all-atom scoring failure, native structure refinement fails to produce models with better (lower) interface scores than incorrect non-native docking models.

*Sampling:* In a sampling failure, the input models are adequately close and the native structures are correctly identified during scoring, but no non-native docked model is close enough to the native structure to fall into the binding funnel.

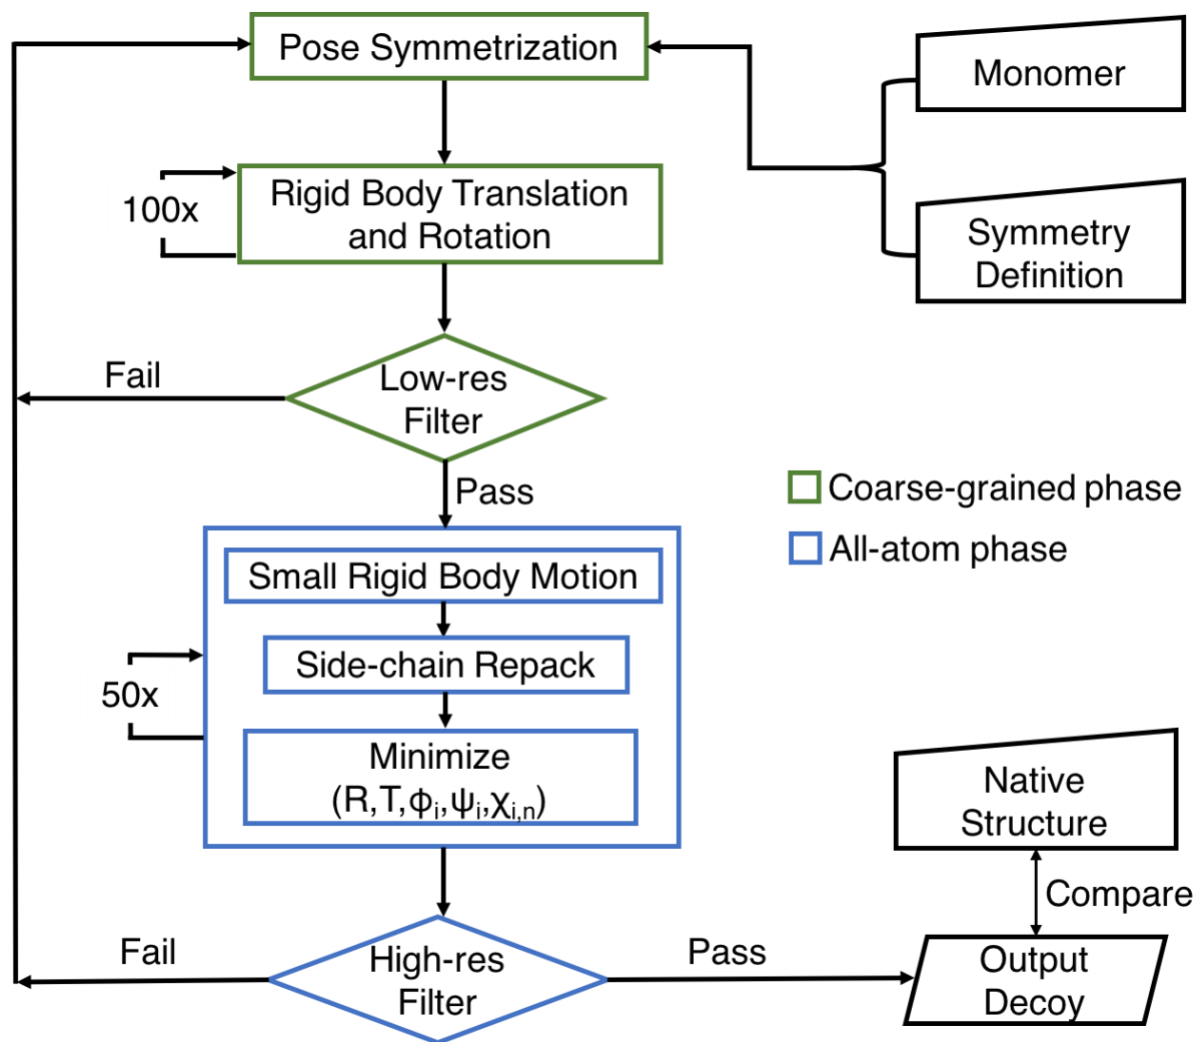

**Figure S1.** Flowchart describing major steps in Rosetta SymDock protocol. In the all-atom phase the structure is minimized along rotational rigid body coordinates (R), translational rigid body coordinates (T), and the dihedrals of the interface residues ( $\{\phi_i, \psi_i, \chi_{i,n}\}$ , where  $i \in \text{interface}$ ). See Methods for filter descriptions. Related to Table 2 and Figure 4.

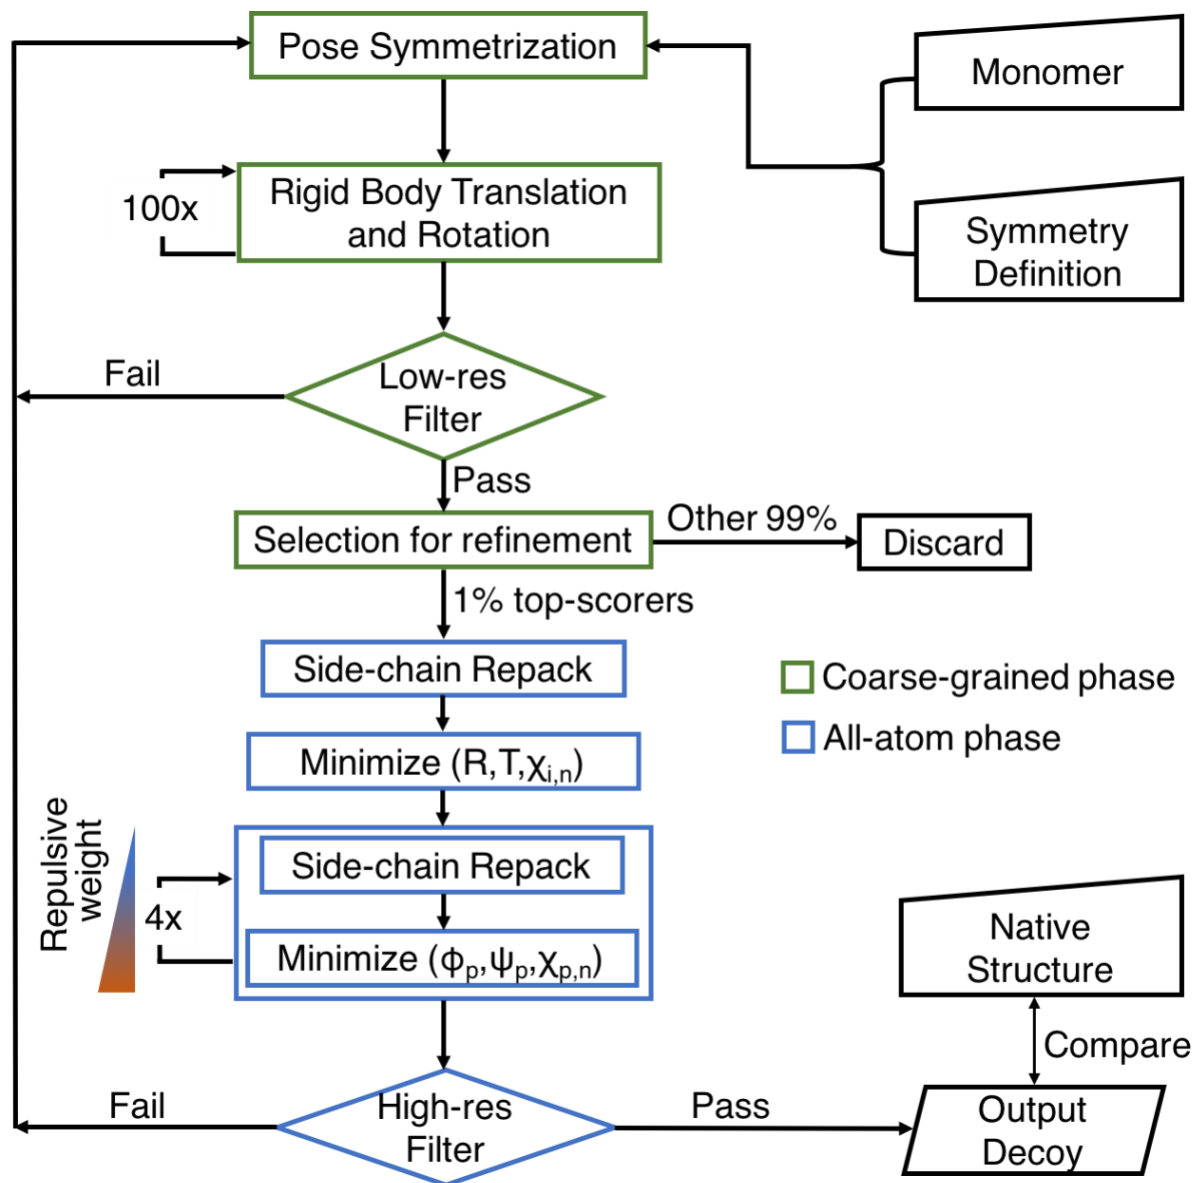

**Figure S2.** Flowchart describing major steps in Rosetta SymDock 2 protocol. In the all-atom phase the structure is initially minimized along rotational rigid body coordinates ( $R$ ), translational rigid body coordinates ( $T$ ), and the dihedrals of the interface residue side chains ( $\chi_{i,n}$ , where  $i \in$  interface). This is followed by four cycles of side-chain repacking and minimization along the dihedrals of all residues ( $\{\phi_p, \psi_p, \chi_{p,n}\}$ , where  $p \in$  protein). Each cycle is carried out at a different weight of the van der Waals repulsive term starting from 2% of the original weight and ramping up to 100%. See Methods for filter descriptions. Related to Table 2 and Figure 4.

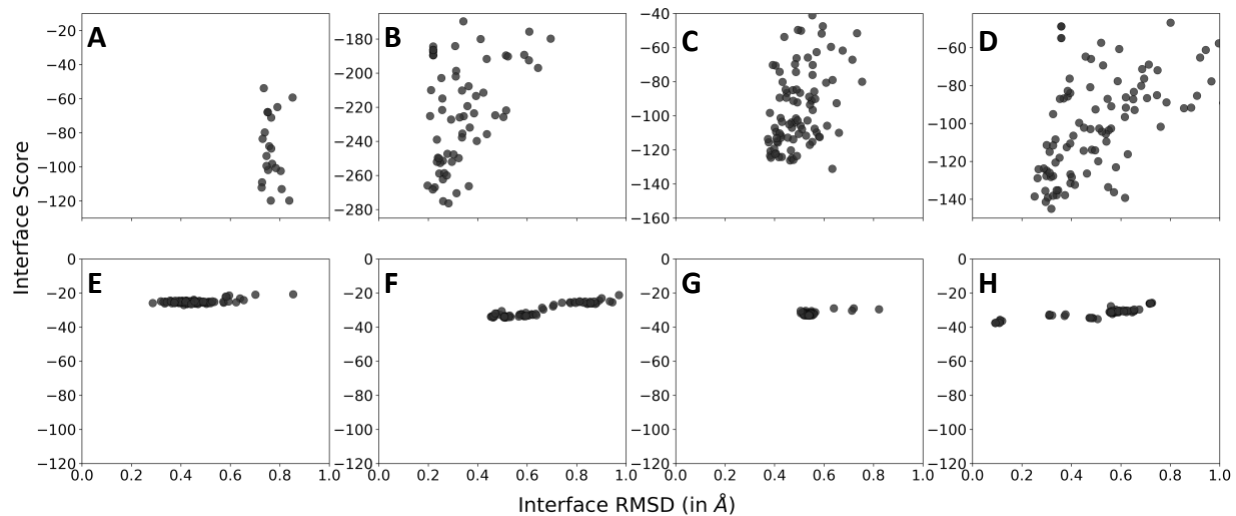

**Figure S3.** Comparison of interface score versus  $\text{RMSD}_{\text{C}\alpha}$  plots produced by native refinement of homomers and hetero-dimers. The four example homomers are: (A) 3,2-trans-enoyl-CoA isomerase (1SG4, C3), (B) snRNP Sm-like protein (1H64, C7), (C) gp23.1 chaperone (2XF7, C6), and (D) Cytolysin (4OWK, C7). The four example hetero-dimers are: (E) APR-APRin complex (1JIW), (F) *L. casei* HprK/P - *B. subtilis* HPr (1KKL), (G) Glutamyl-tRNA synthetase (2HRK), and (H) IL-13 and C836 FAB (3L5W). In all plots, the y-axis spans 120 energy units. In general, homomer binding funnels are deeper, steeper and narrower. Related to Figure 2.

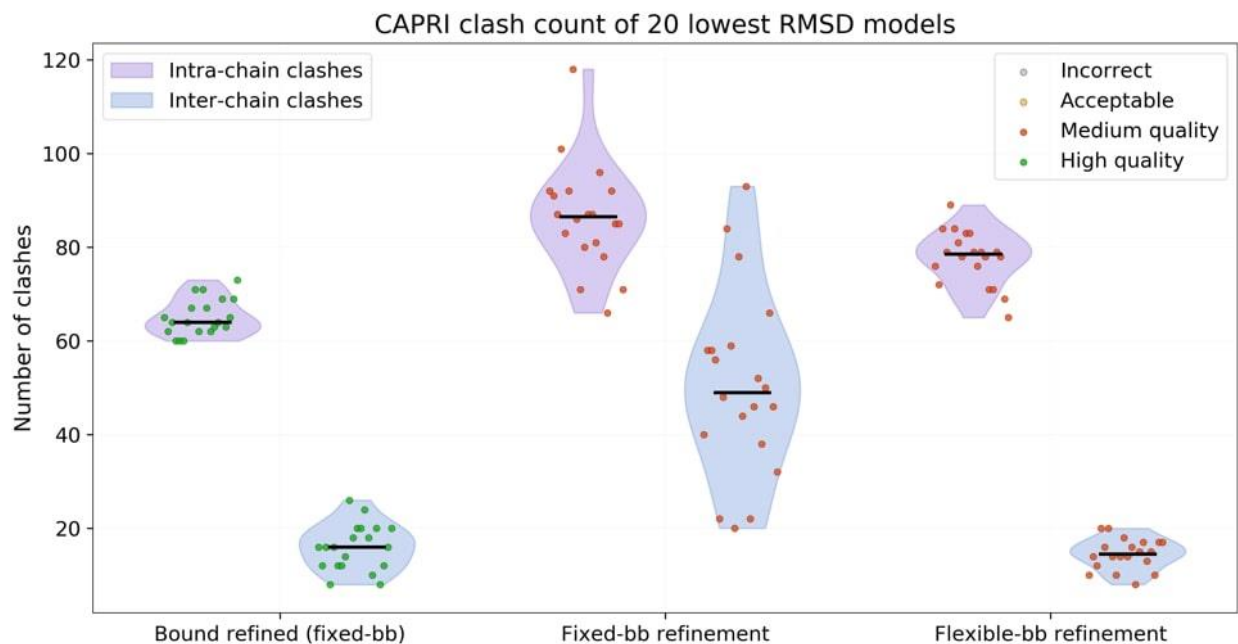

**Figure S4.** Count of intra-chain and inter-chain clashes for interface residues of *Xenopus* Nucleophosmin as per CAPRI definition. The 20 lowest RMSD models are chosen. Flexible-backbone refinement of complex starting from homology-modeled monomer reduces inter-chain clashes to be close to that observed after fixed-backbone refinement of the native structure. Related to Figure 3.
