# Supplementary material
Source: PubMed Central journal article supplement (PMC6719319)

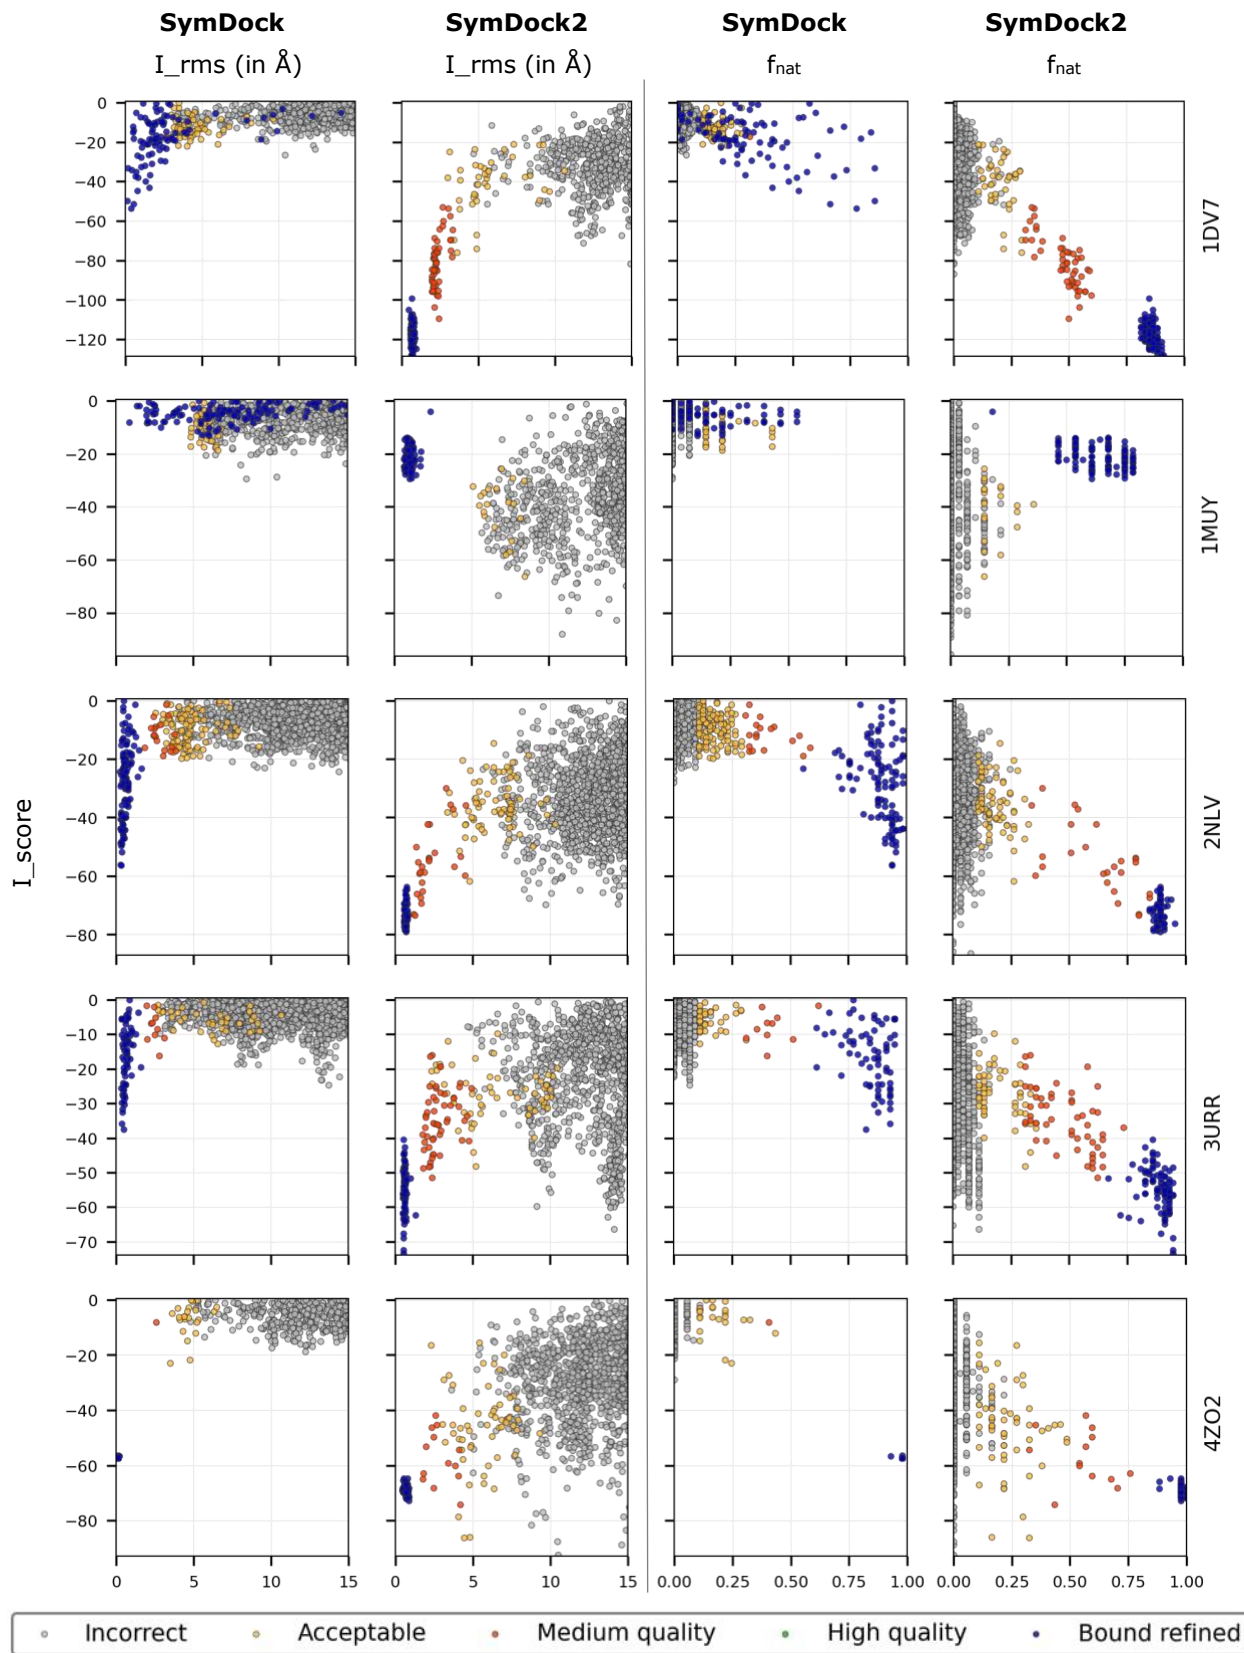

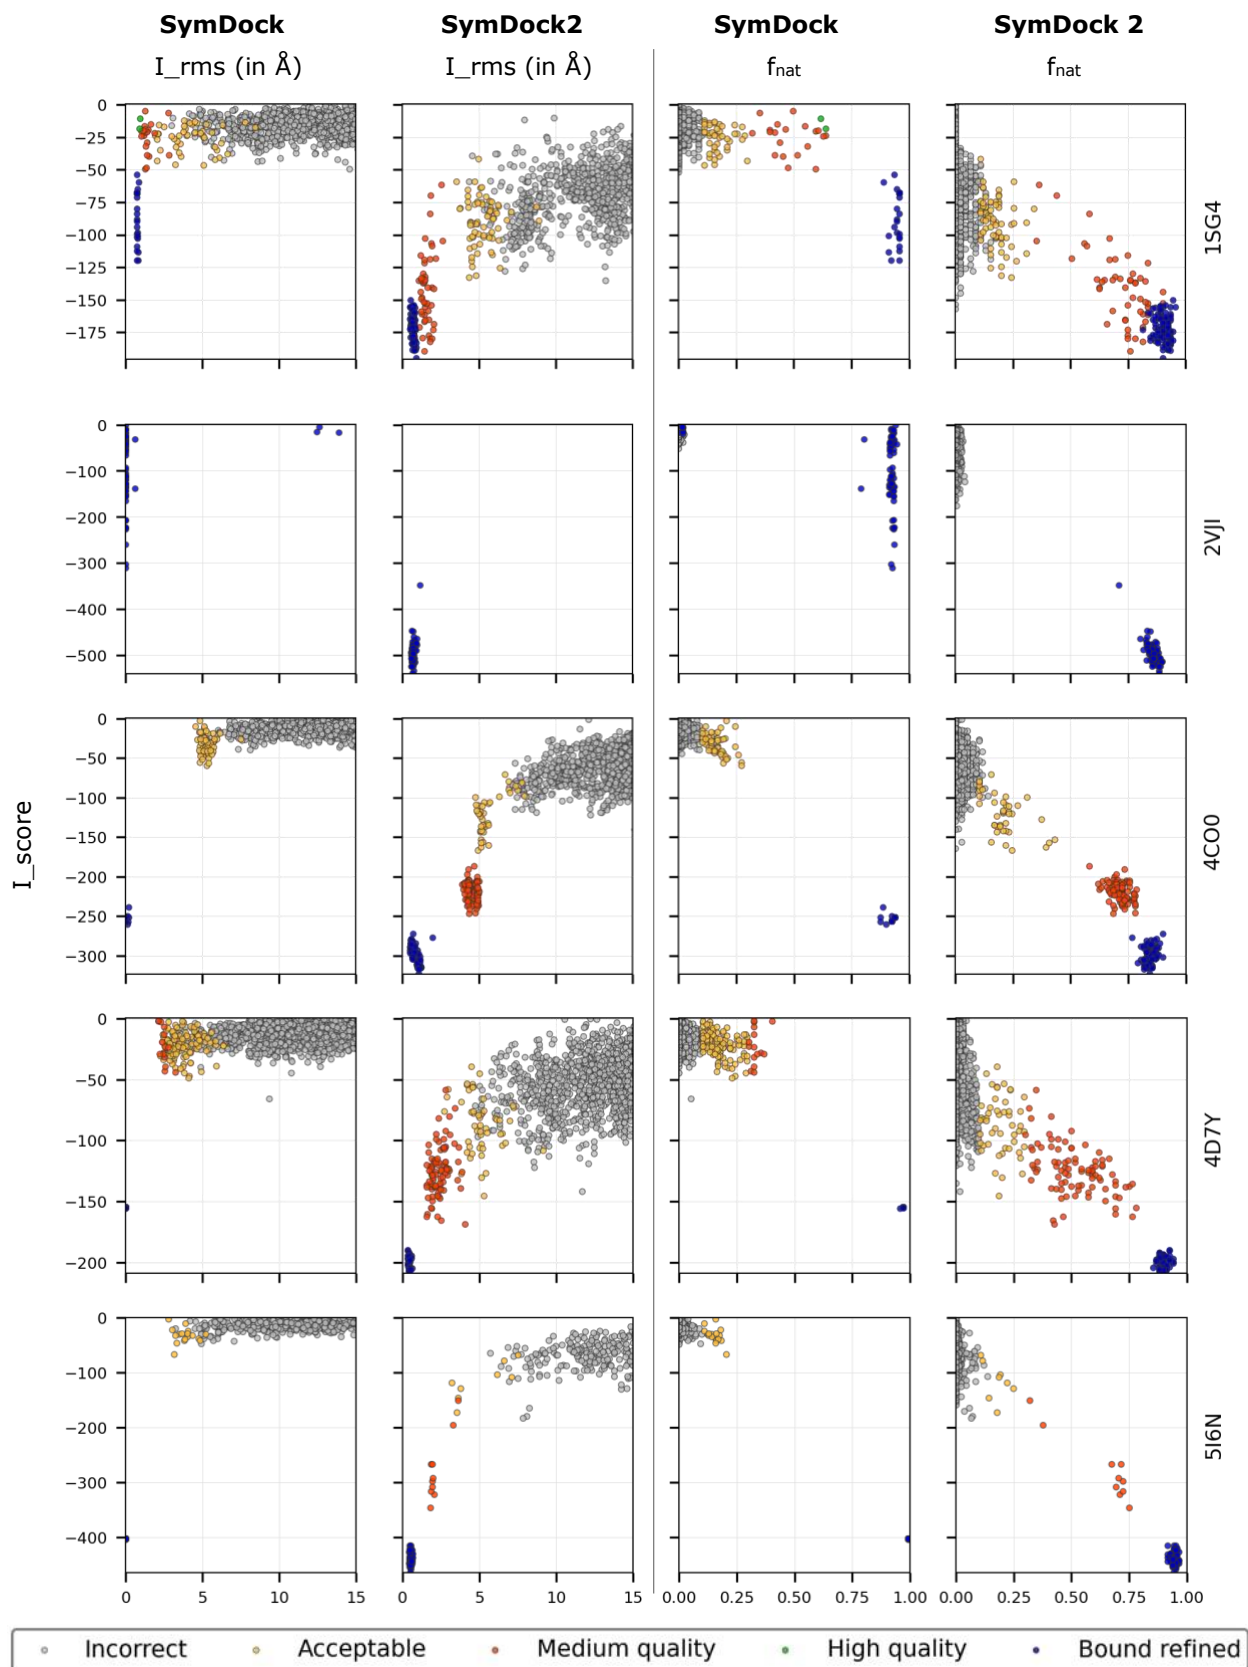

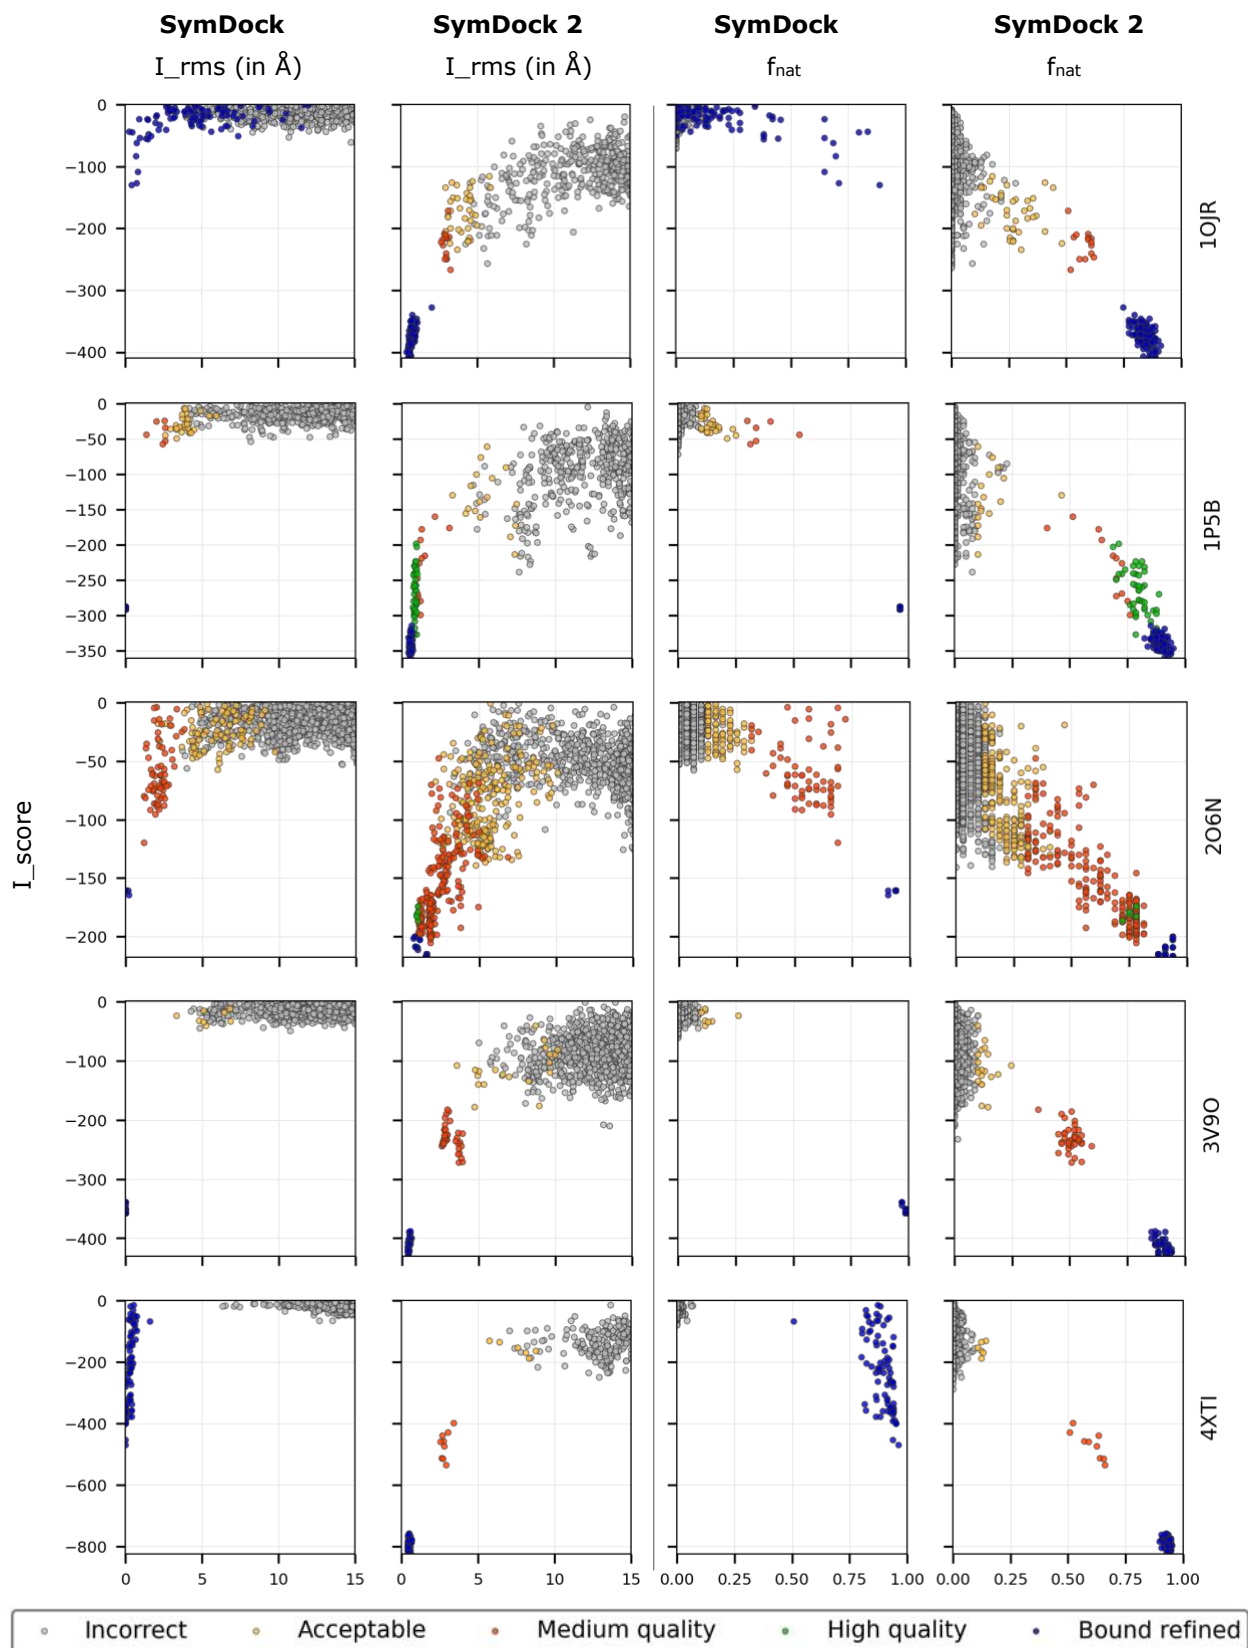

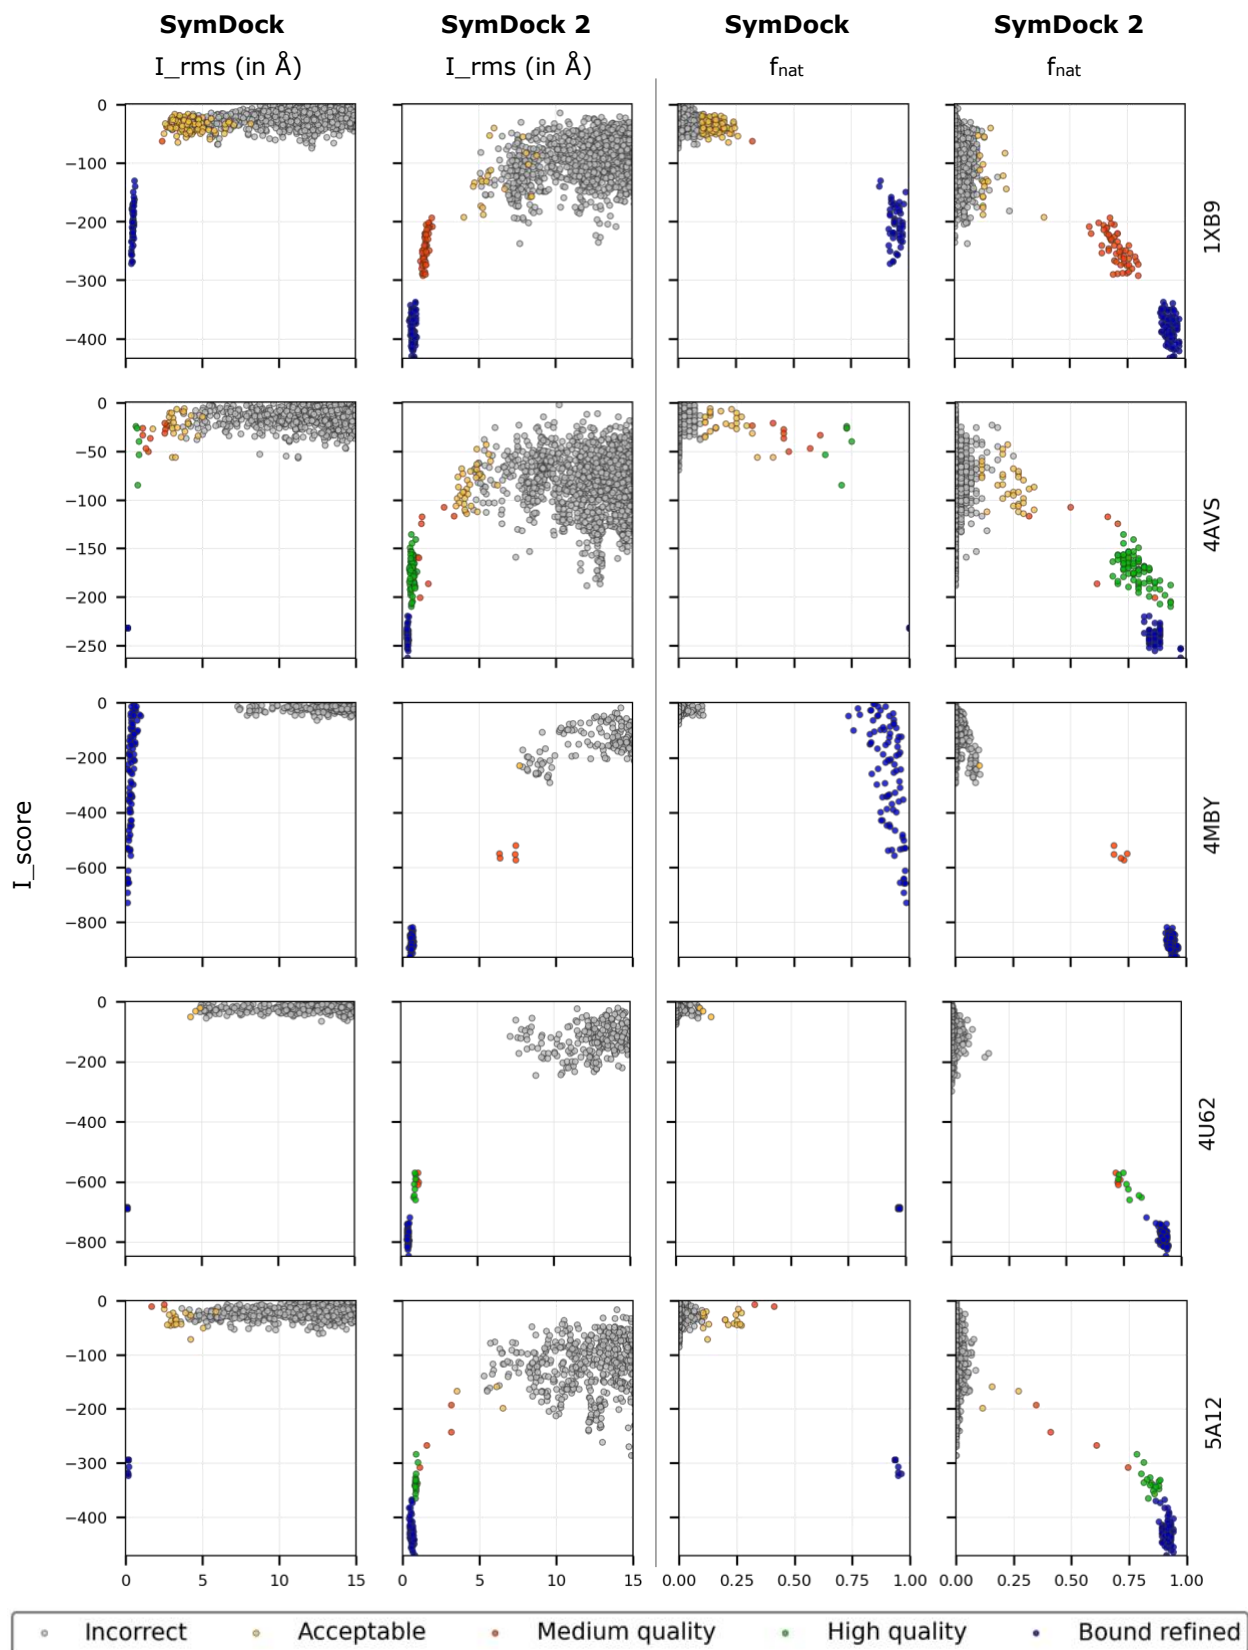

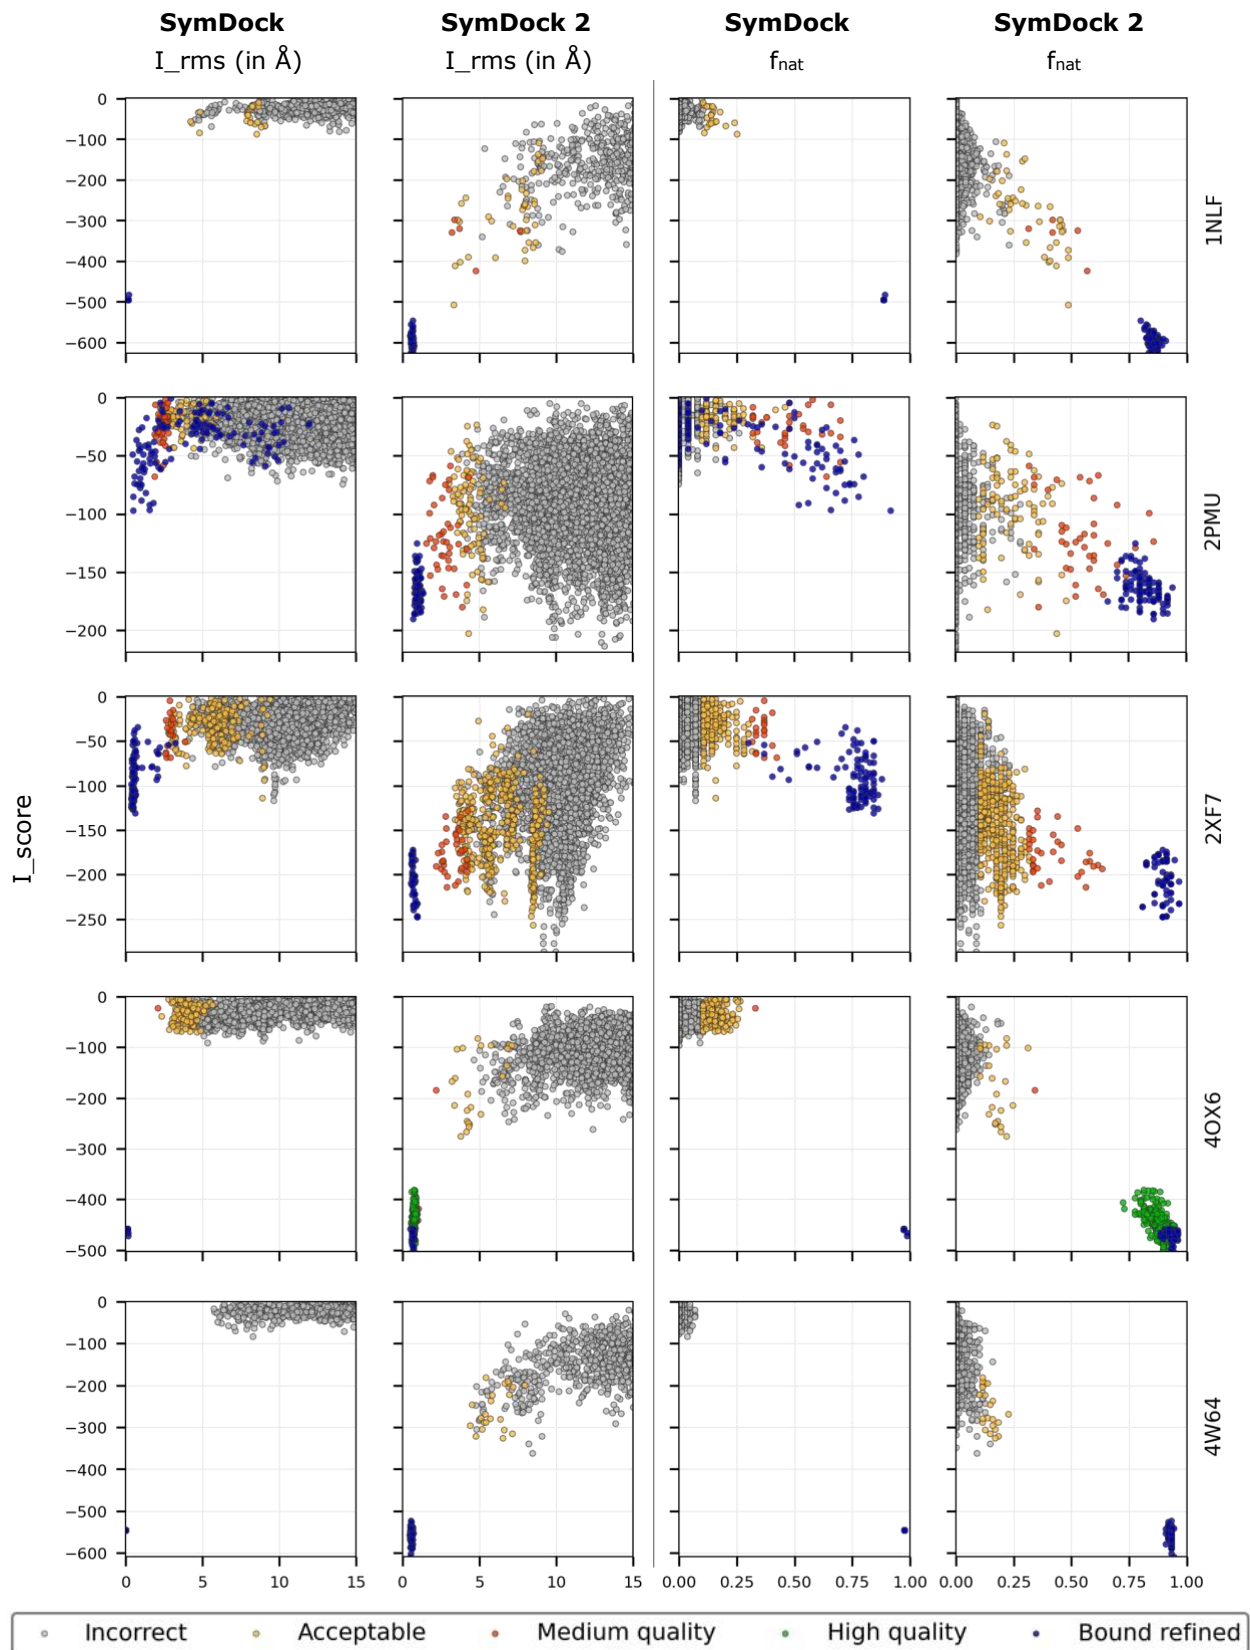

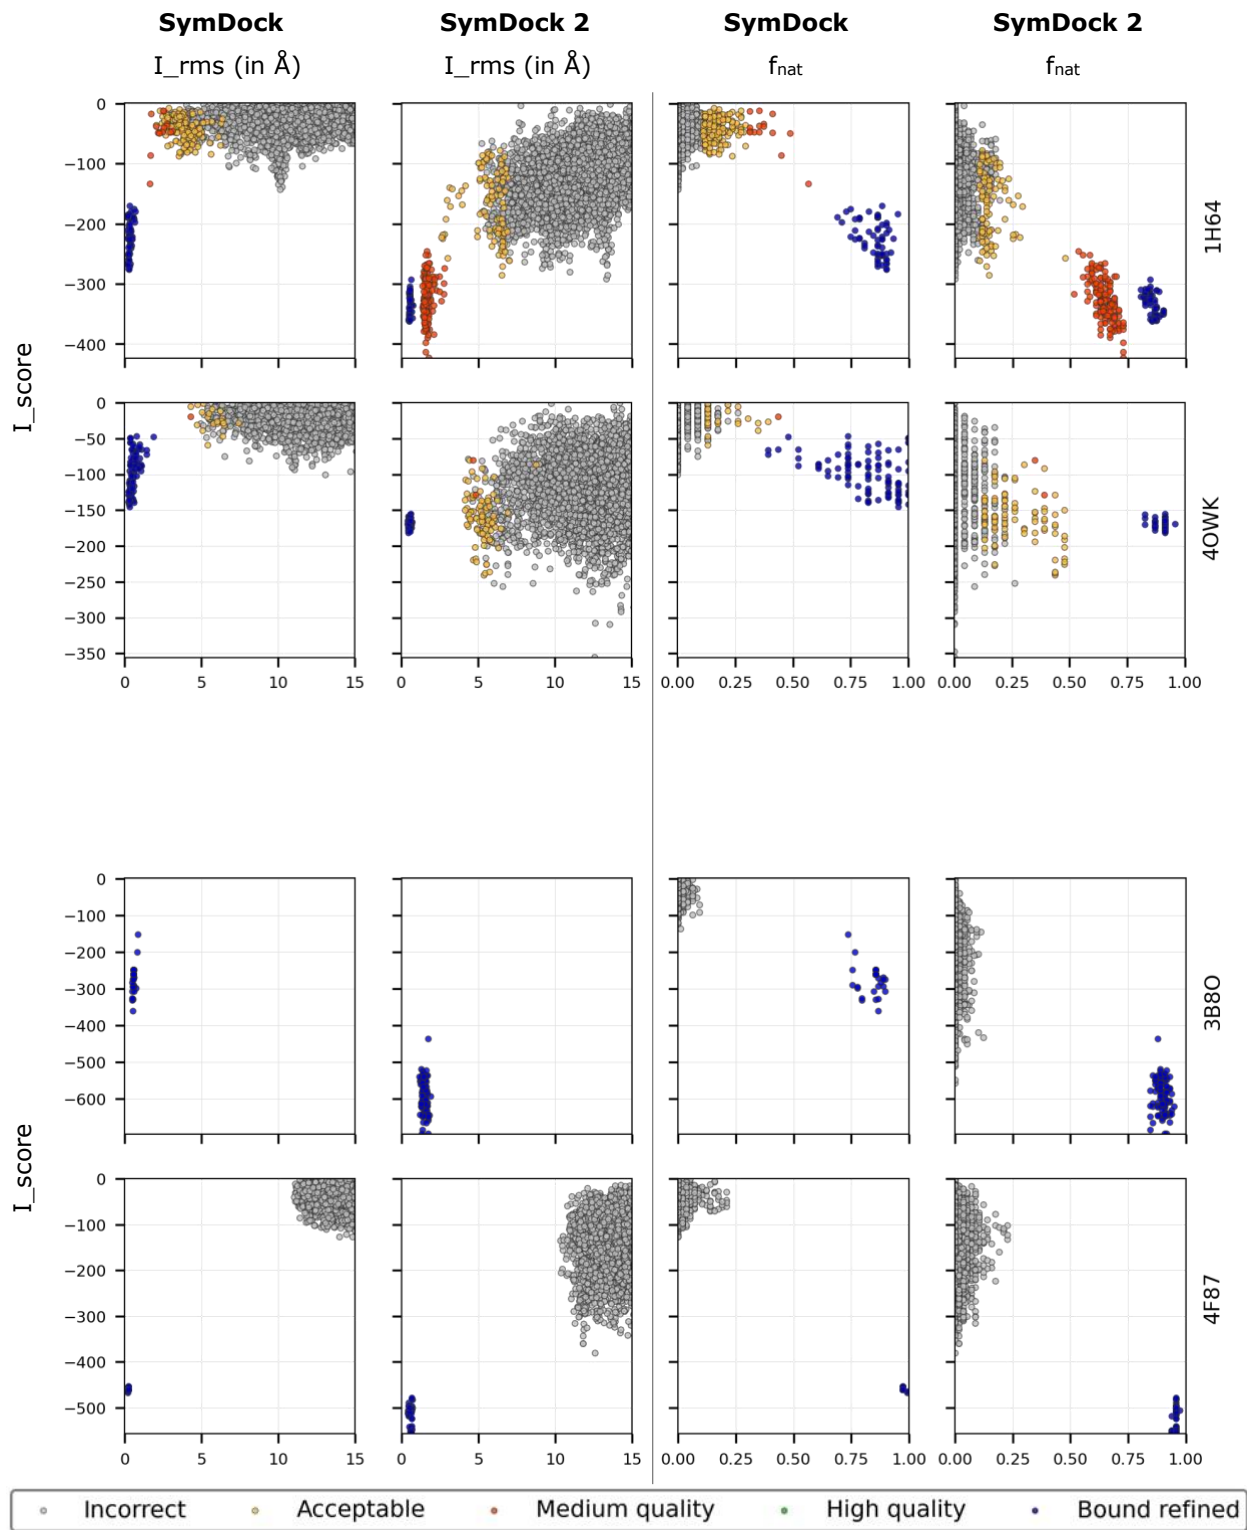

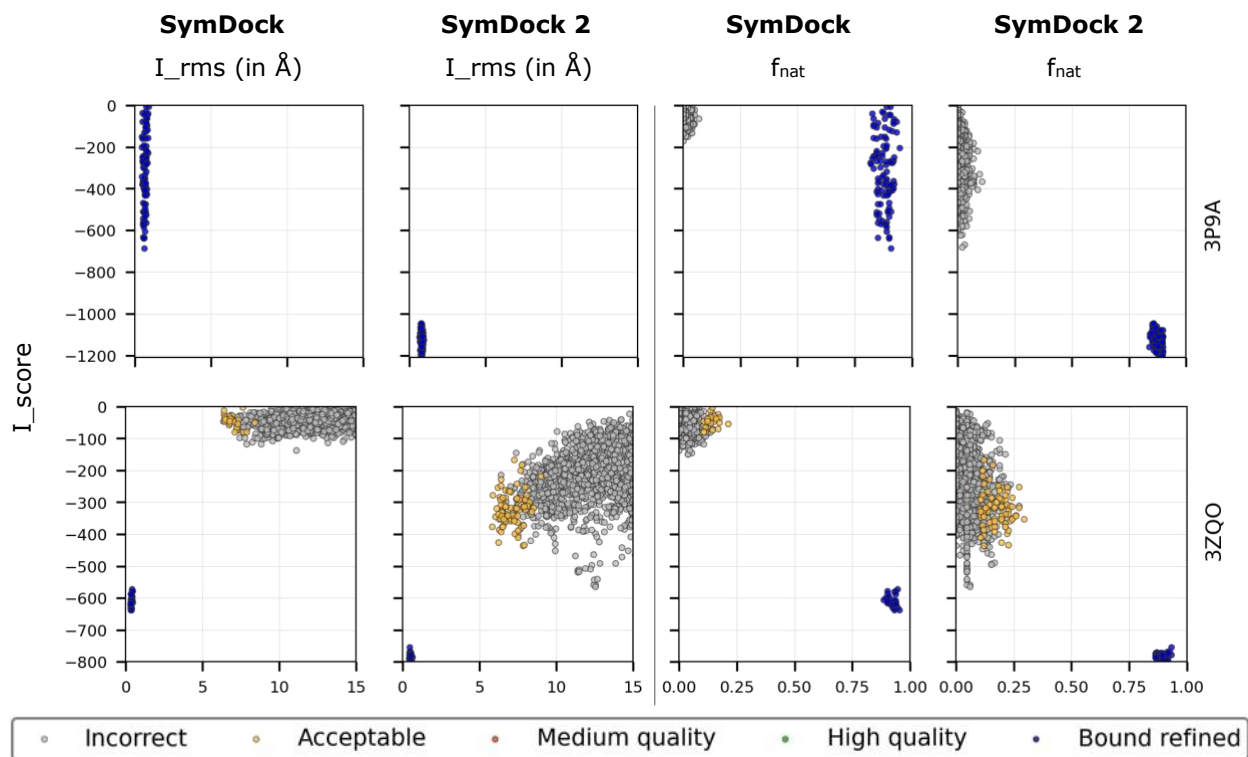

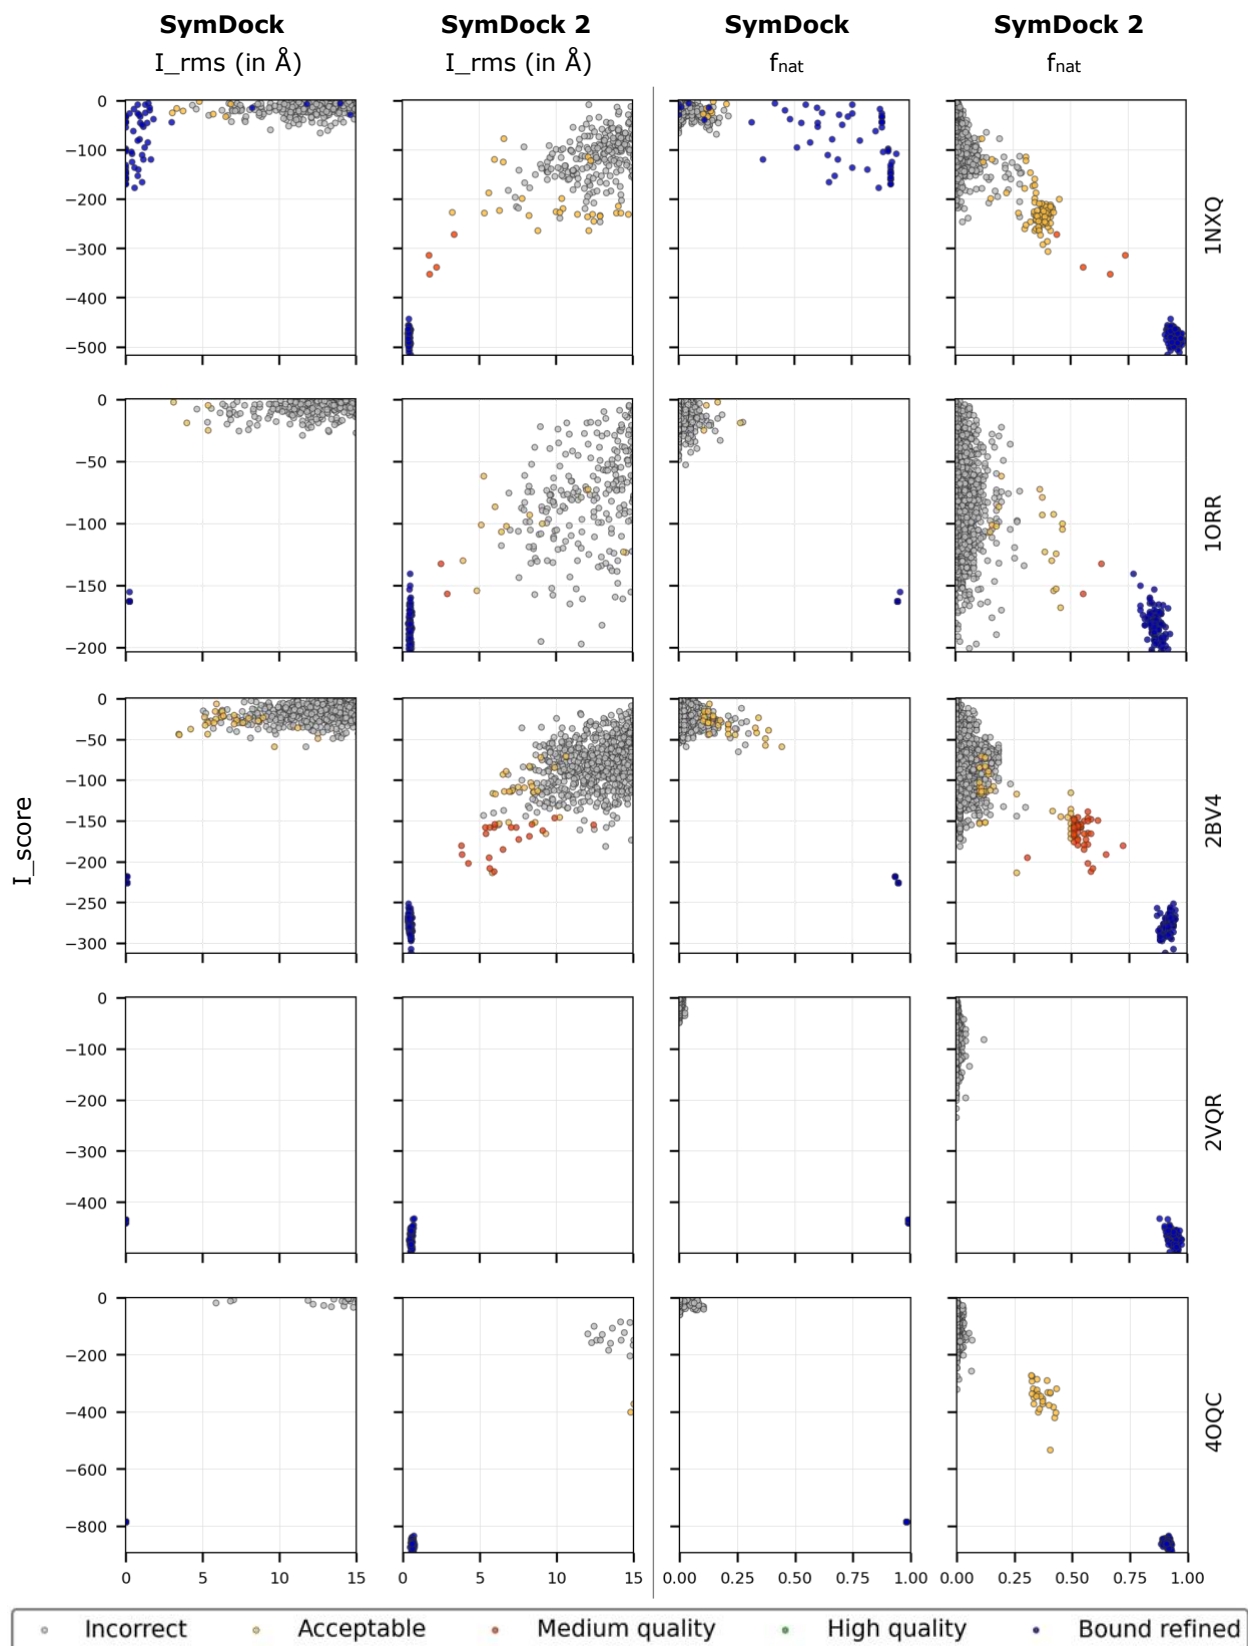



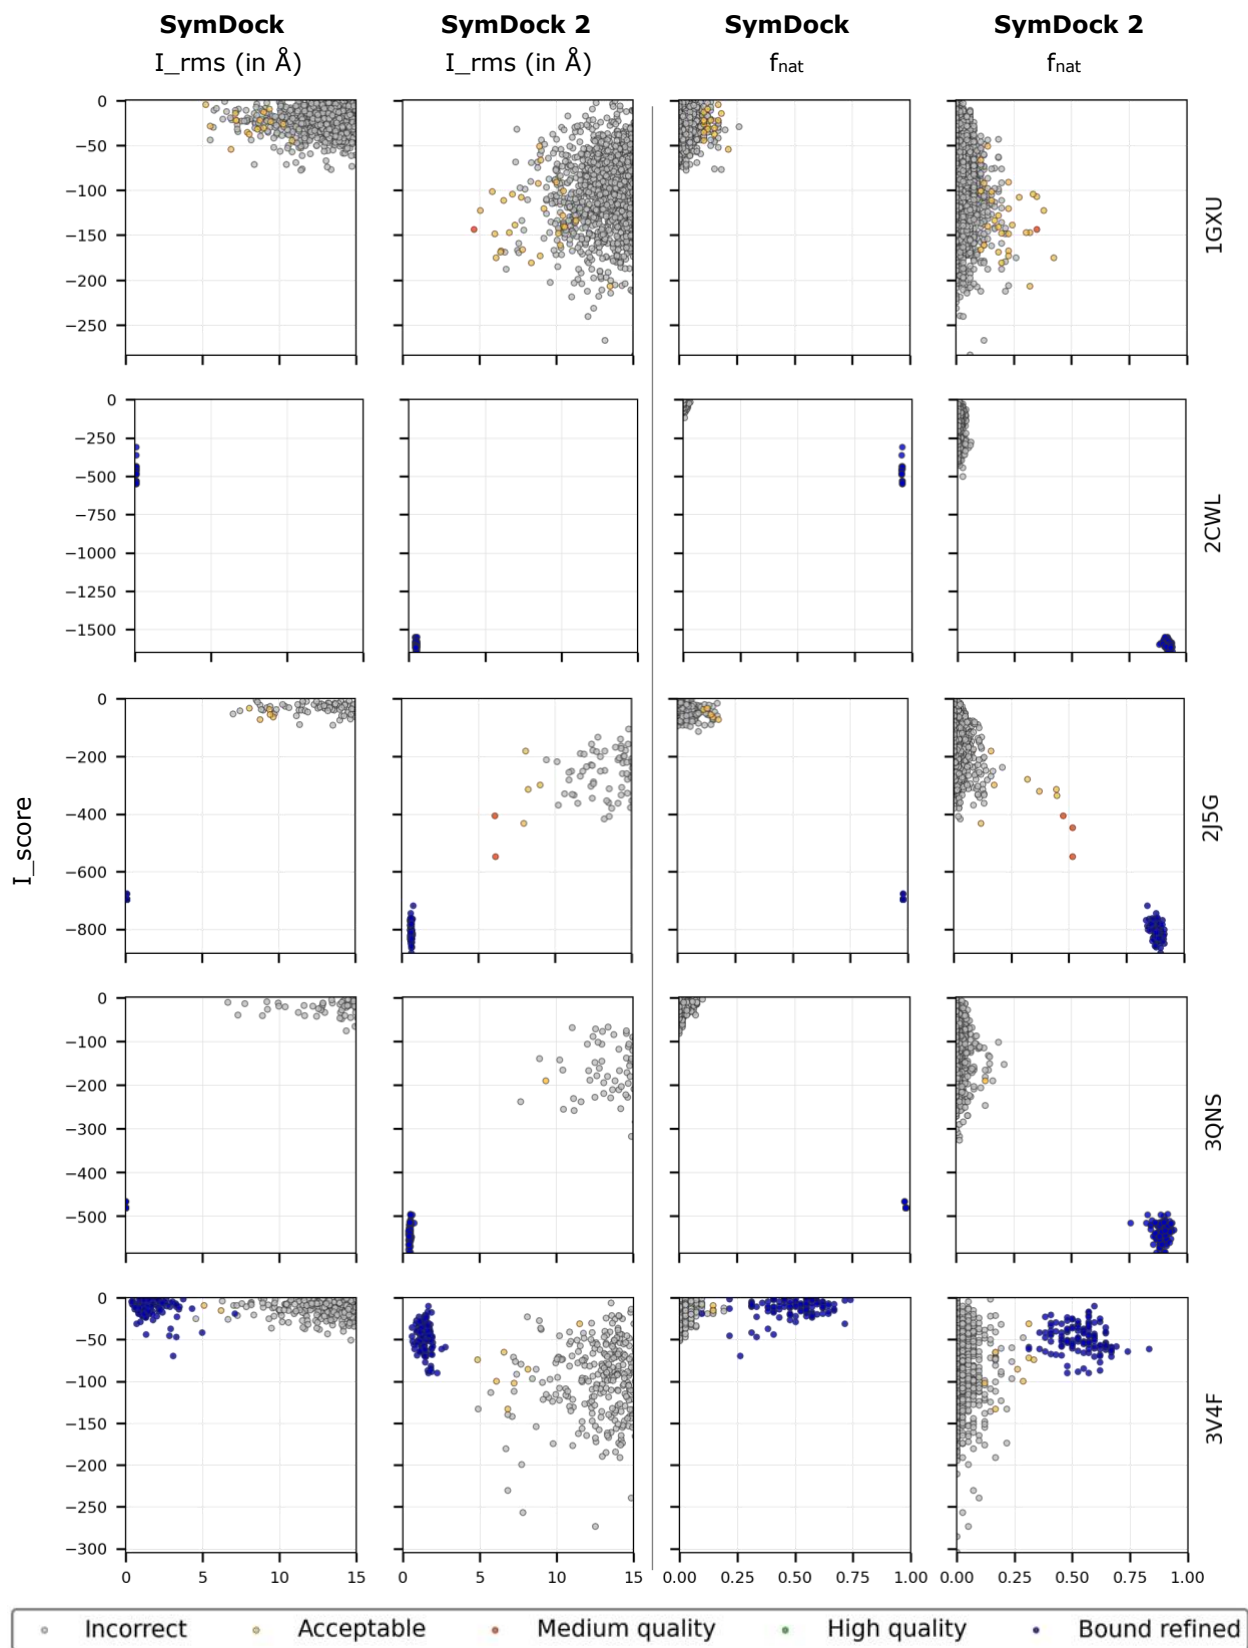

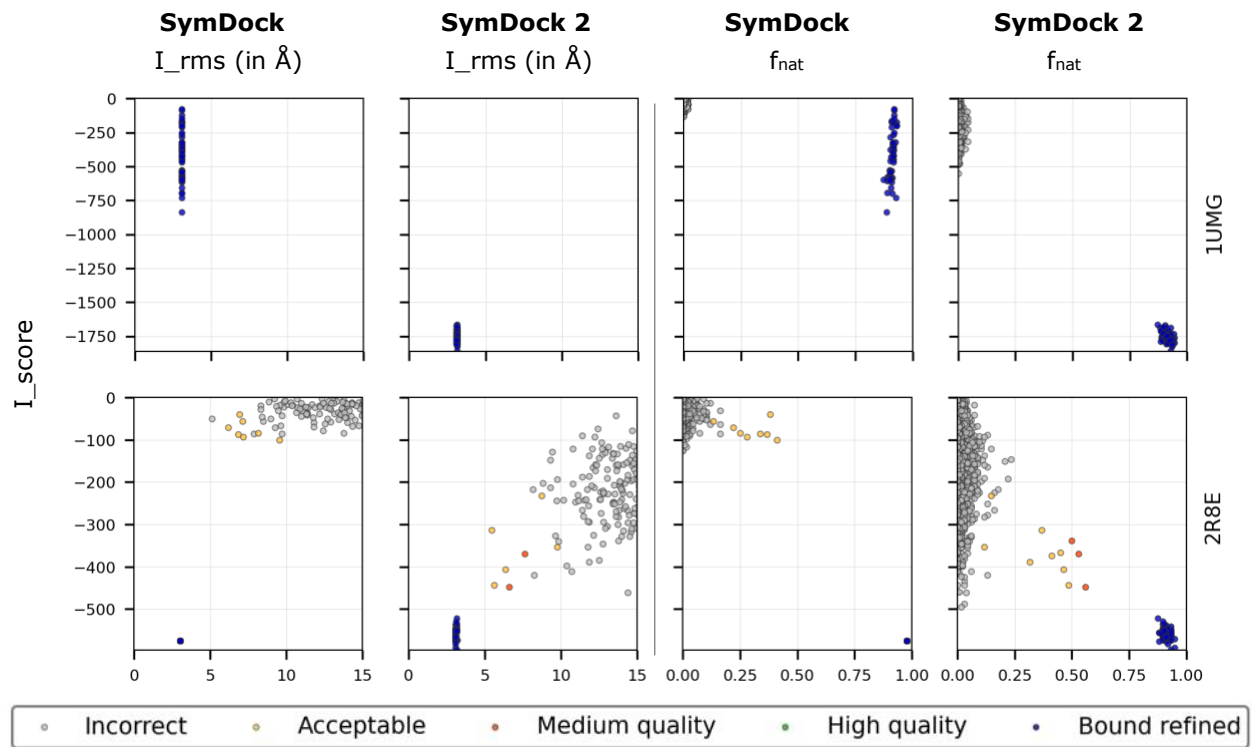

Supplement: NIHMS1526414-supplement-3.pdf [file NIHMS1526414-supplement-3.pdf]
